# Supplementary material for: Six3 regulates optic nerve development via multiple mechanisms
Source: PubMed Central journal article supplement (PMC4731751; doi:10.1038/srep20267), 2016-01-29
Supplement: srep20267-s1.pdf [file srep20267-s1.pdf]

**Supplementary Information to:**

**Six3 regulates optic nerve development via multiple mechanisms**

Anat Samuel<sup>1</sup>, Ariel M. Rubinstein<sup>1</sup>, Tehila T. Azar<sup>1</sup>, Zohar Ben-Moshe<sup>2</sup>,

Seok-Hyung Kim<sup>3,4</sup> and Adi Inbal<sup>1,\*</sup>

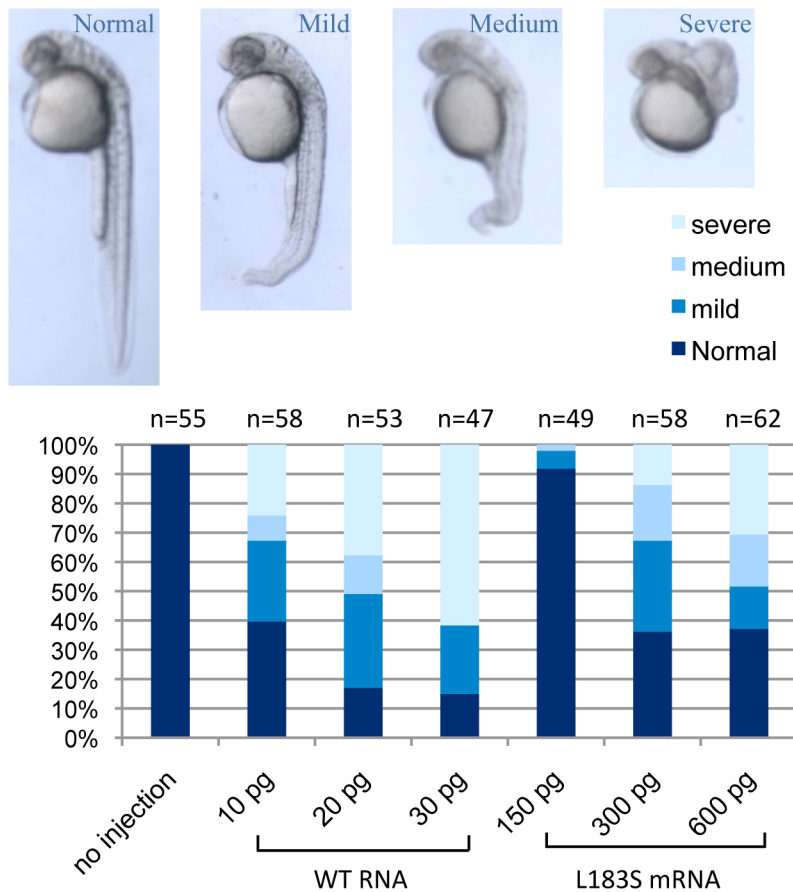

**Figure S1. Results of normal *six3a* and *six3a<sup>vu129</sup>* misexpression.** Live embryos at 26 hpf after injection of synthetic RNA encoding normal or mutant Six3a<sup>L183S</sup>. Four phenotypic groups were scored: normal looking, mild: slightly dorsalized, medium: moderately dorsalized and severe: strongly dorsalized. The percentage of embryos from each group after injection of different doses of normal or mutant *six3a* RNA is shown in the graph, with phenotypes color-coded. The number (n) of embryos in each group and injection doses are depicted on top and bottom of bars, respectively.

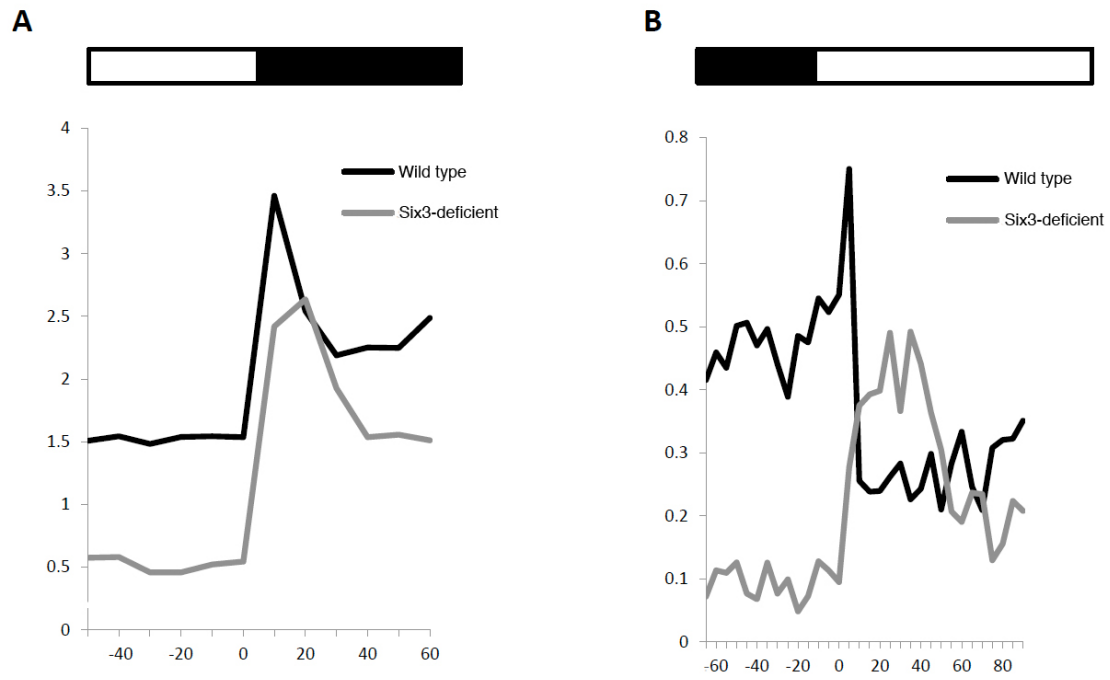

**Figure S2. Visual-motor responses of Six3-deficient larvae.** (A,B) Locomotor behavior of 6 dpf WT and Six3-deficient larvae expressed in cm per 10 seconds (A) or 5 seconds (B). Each trace represents an average from four events, of 80 responses from 20 individual larvae.

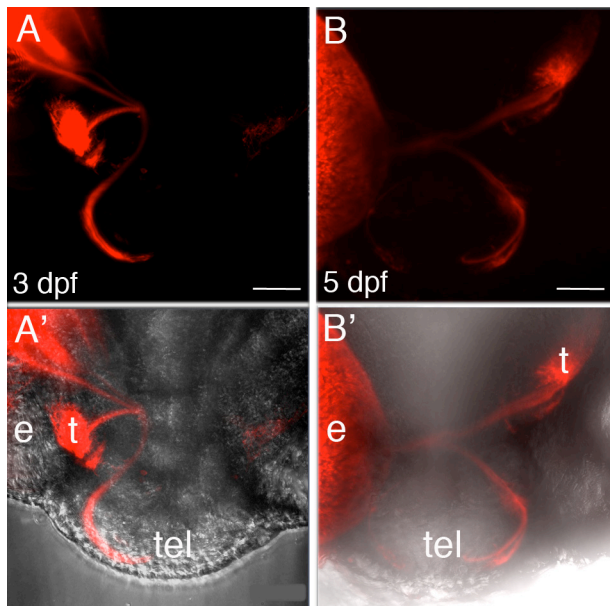

**Figure S3. RGC axon misrouting in *Six3*-deficient embryos.** (A, B) Two examples from 3 and 5 dpf *Six3*-deficient embryos, of RGC axon misrouting with axons projecting from one eye both to tectum and telencephalon. (A', B') are the same images as A and B, respectively, with overlay on bright field image to help visualize anatomy. Eyes were labelled with DiI. e, eye; t, tectum; tel, telencephalon.

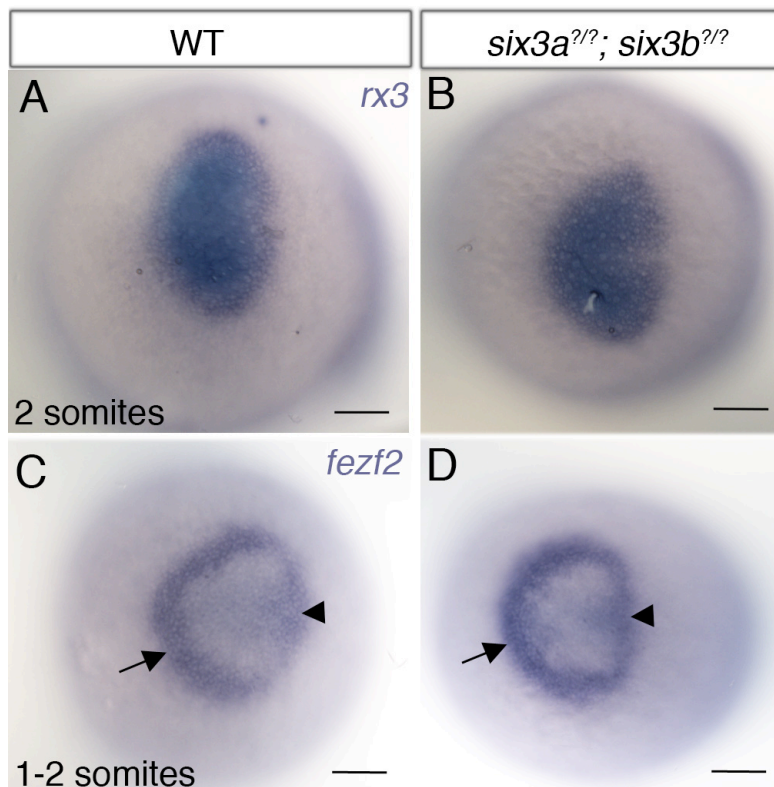

**Figure S4. Early neural plate patterning appears normal in *six3a;six3b* double mutants.** (A-D) Wild-type embryos (A,C) and embryos from crosses between *six3a;six3b* double heterozygous parents (n>100 for each labelling) (B,D) were labelled by *in situ* hybridization for eye field marker *rx3* (A,B) and neural plate marker *fezf2* (C,D) at early segmentation. All embryos in clutches from *six3a;six3b* double heterozygous parent appeared similar and comparable to wild type. (C,D) Arrows and arrowheads point at presumptive telencephalon and ventral diencephalon, respectively.
